# Supplementary material for: High-performance energy-storage ferroelectric multilayer ceramic capacitors via nano-micro engineering
Source: Royal Society of Chemistry journal article supplement (doi:10.1039/d2ta08523b), 2023-01-01
Supplement: d2ta08523b1.pdf [file d2ta08523b1.pdf]

## Supplementary material

### Supplementary material

### High-performance energy-storage ferroelectric multilayer ceramic capacitor via nano-micro engineering

Ziyue Ma<sup>1</sup>, Yong Li<sup>1,\*</sup>, Ye Zhao<sup>1</sup>, Ningning Sun<sup>1</sup>, Chunxiao Lu<sup>1</sup>, Pei Han<sup>1</sup>, Dawei Wang<sup>2,3,\*</sup>, Yanhua Hu<sup>4</sup>, XiaoJie Lou<sup>5</sup>, Xihong Hao<sup>1,\*</sup>

<sup>1</sup>Inner Mongolia Key Laboratory of Ferroelectric-Related New Energy Materials and Devices, School of Materials and Metallurgy, Inner Mongolia University of Science and Technology, Baotou 014010, China

<sup>2</sup>Shenzhen Institute of Advanced Electronic Materials, Shenzhen Institute of Advanced Technology, Chinese Academy of Sciences, Shenzhen 518055, China

<sup>3</sup>Functional Materials and Acousto-Optic Instruments Institute, School of Instrumentation Science and Engineering, Harbin Institute of Technology, Harbin 150080, China

<sup>4</sup>Department of Chemical Engineering, Ordos institute of technology, Erdos 017000, China

<sup>5</sup>Frontier Institute of Science and Technology, and State Key Laboratory for Mechanical Behavior of Materials, Xi'an Jiaotong University, Xi'an 710049, China

\*Corresponding author. E-mail: liyong3062545@126.com; wangdawei102@gmail.com; xihonghao2022@163.com.

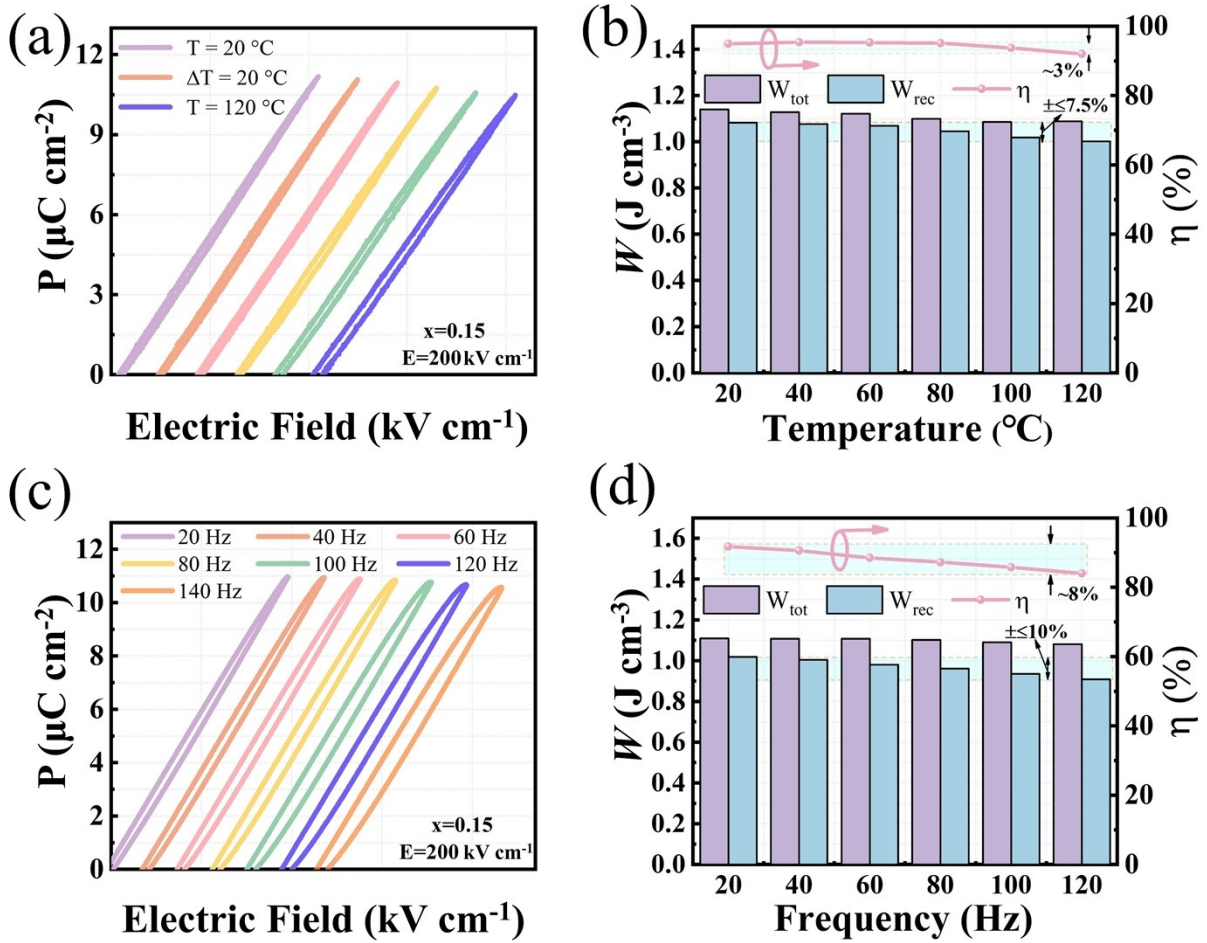

**Fig. S1.**  $P$ - $E$  loop of  $x=0.15$  ceramic as a function of (a) temperature, (c) frequency. (b) The temperature dependent, (d) the frequency dependent  $W_{\text{tot}}$ ,  $W_{\text{rec}}$  and  $\eta$  of  $x=0.15$ .

## Supplementary material

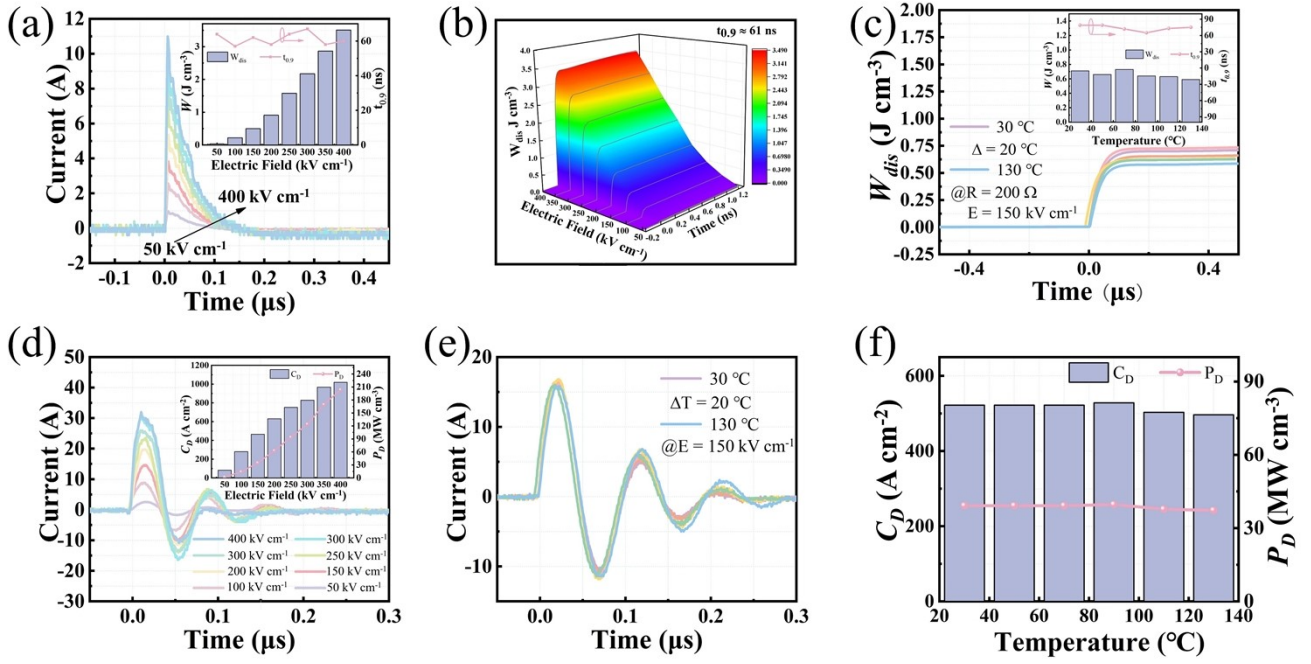

**Fig. S2.** (a-b) The discharge current waveform,  $W_{dis}$  and  $t_{0.9}$  of x=0.15 ceramic in the overdamped state at different electric fields and the inset shows the corresponding  $W_{dis}$  and  $t_{0.9}$ . (c) The  $W_{dis}$  of x=0.15 ceramic in the overdamped state at different temperatures and the inset shows the corresponding  $W_{dis}$  and  $t_{0.9}$ . (d) The discharge current waveform of x=0.15 ceramic in the underdamped state at different electric fields and the inset shows the corresponding  $C_D$  and  $P_D$ . (e-f) The discharge current waveform,  $C_D$  and  $P_D$  of x=0.15 ceramic in the underdamped state at different temperatures.

Supplementary material

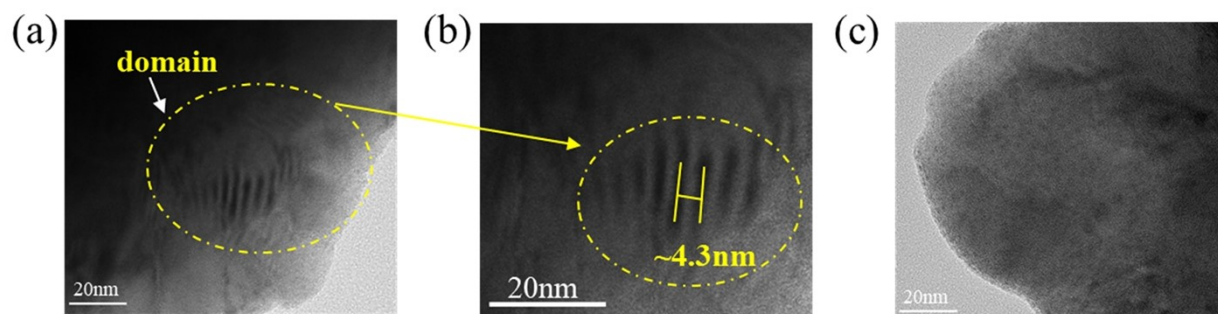

**Fig. S3.** TEM images of (a-b)  $x=0.05$  and (c)  $x=0.2$ .

Supplementary material

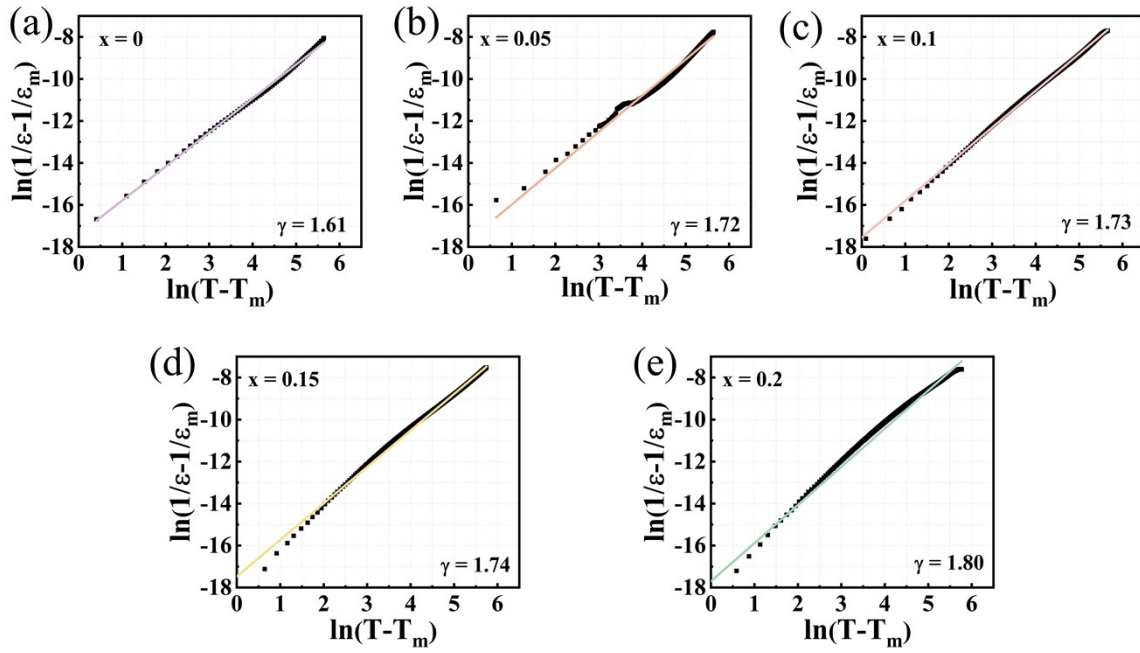

**Fig. S4.** The  $\ln(1/\epsilon_r - 1/\epsilon_m)$  varies with  $\ln(T - T_m)$  of  $(1-x)(0.65\text{NBT}-0.35\text{ST})-x\text{LMZ}$  ceramics (a)  $x=0$ , (b)  $x=0.05$ , (c)  $x=0.1$ , (d)  $x=0.15$ , (e)  $x=0.2$ .

## Supplementary material

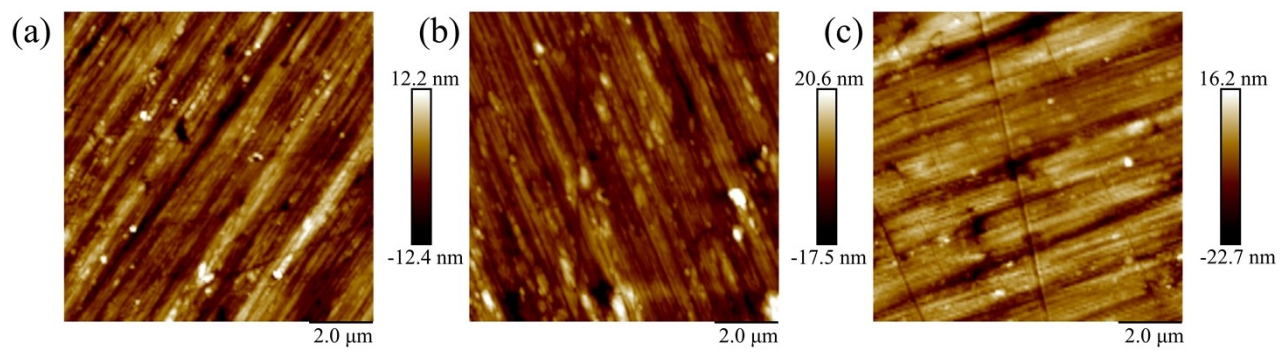

**Fig. S5.** The topography pictures of: (a)  $x=0$ , (b)  $x=0.10$  and (c)  $x=0.15$  ceramics.

Supplementary material

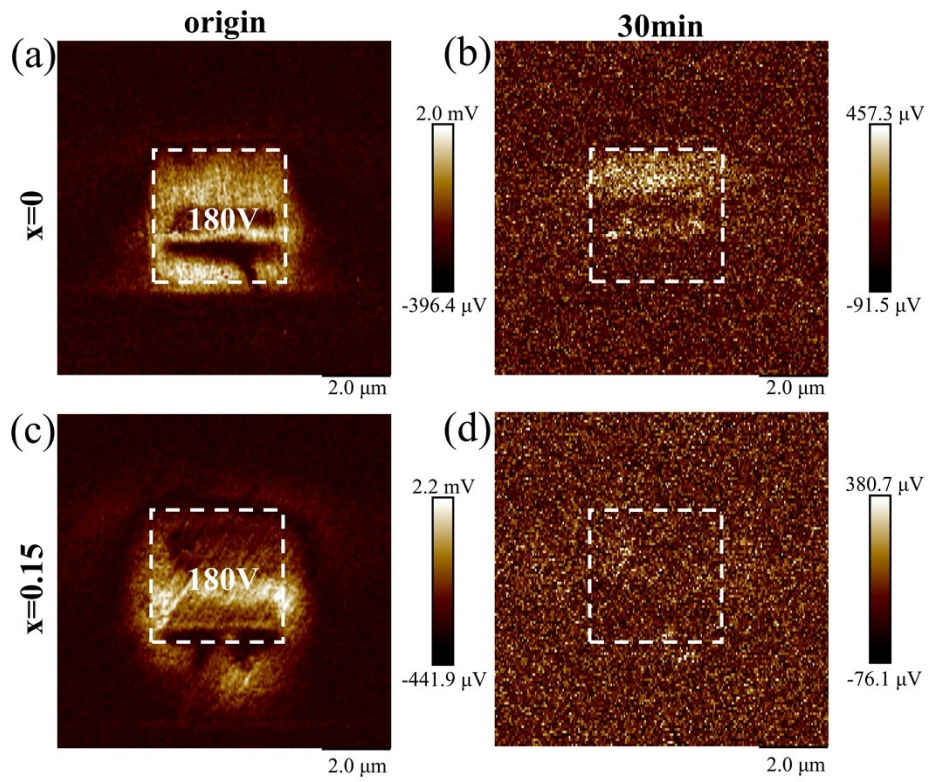

**Fig. S6.** Out-of-plane PFM amplitude pictures and domains evolution under different times for (a-b)  $x=0$  and (c-d)  $x=0.15$  ceramics.

## Supplementary material

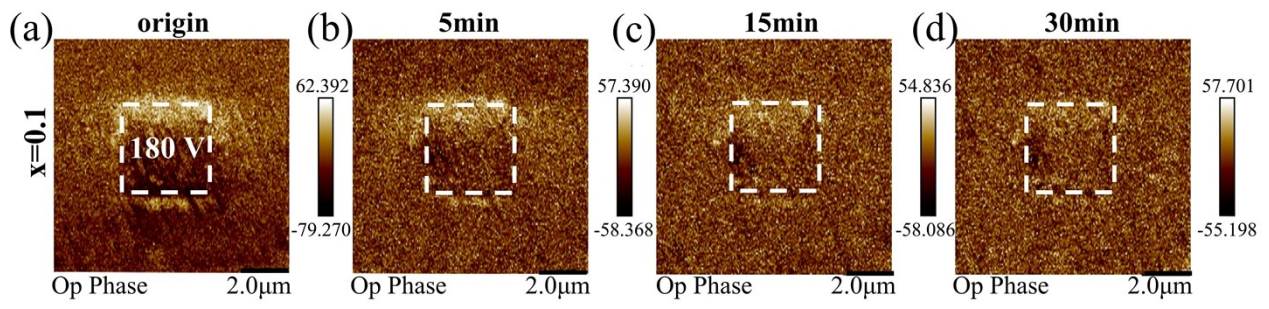

**Fig. S7.** Out-of-plane PFM phase pictures and domains evolution under different times for  $x=0.1$  ceramics.



## Supplementary material

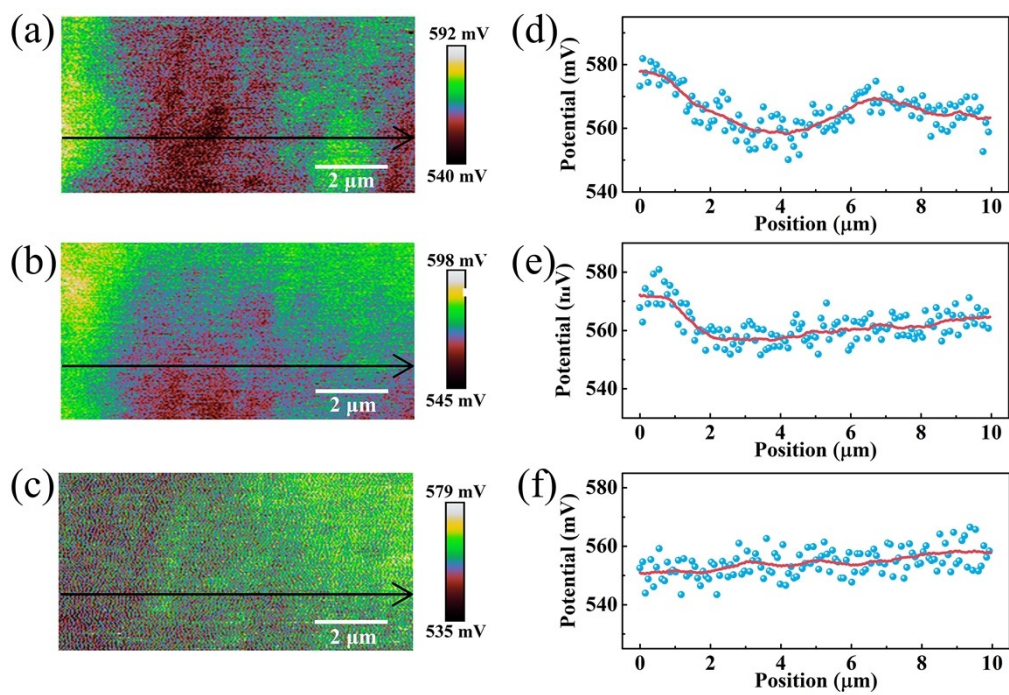

**Fig. S8.** Potential maps, and potential profile of (a,d)  $x=0.05$ , (b,e)  $x=0.10$  and (c,f)  $x=0.2$ .
